# Supplementary material
Source: publisher site journal article supplement (https://www.degruyterbrill.com/publication/isbn/9783899498592/downloadAsset/9783899498592_Inhaltsverzeichnis.pdf)
Supplement: Supplementary file 1 [file 9783899498592_Inhaltsverzeichnis.pdf]

# Inhaltsübersicht

|                                                                             |        |
|-----------------------------------------------------------------------------|--------|
| Bearbeiterverzeichnis . . . . .                                             | VII    |
| Vorwort . . . . .                                                           | IX     |
| Vorbemerkungen zur Lebensversicherung . . . . .                             | XI     |
| Verzeichnis der Abkürzungen und der abgekürzt zitierten Literatur . . . . . | XV     |
| Verzeichnis der GDV-Musterbedingungen für die Lebensversicherung . . . . .  | XXXVII |

## VERSICHERUNGSVERTRAGSGESETZ

### Teil 2

## EINZELNE VERSICHERUNGSZWEIGE

### Kapitel 5

#### Lebensversicherung

|                        |                                                            |     |
|------------------------|------------------------------------------------------------|-----|
| vor §§ 150–171         | Einführung . . . . .                                       | 1   |
| § 150                  | Versicherte Person . . . . .                               | 115 |
| § 151                  | Ärztliche Untersuchung . . . . .                           | 162 |
| § 152                  | Widerruf des Versicherungsnehmers . . . . .                | 171 |
| § 153                  | Überschussbeteiligung . . . . .                            | 192 |
| § 154                  | Modellrechnung . . . . .                                   | 265 |
| § 155                  | Jährliche Unterrichtung . . . . .                          | 278 |
| § 156                  | Kenntnis und Verhalten der versicherten Person . . . . .   | 286 |
| § 157                  | Unrichtige Altersangabe . . . . .                          | 294 |
| § 158                  | Gefähränderung . . . . .                                   | 306 |
| § 159                  | Bezugsberechtigung . . . . .                               | 314 |
| § 160                  | Auslegung der Bezugsberechtigung . . . . .                 | 472 |
| § 161                  | Selbsttötung . . . . .                                     | 493 |
| § 162                  | Tötung durch Leistungsberechtigten . . . . .               | 543 |
| § 163                  | Prämien- und Leistungsänderung . . . . .                   | 548 |
| § 164                  | Bedingungsanpassung . . . . .                              | 575 |
| § 165                  | Prämienfreie Versicherung . . . . .                        | 589 |
| § 166                  | Kündigung des Versicherers . . . . .                       | 607 |
| § 167                  | Umwandlung zur Erlangung eines Pfändungsschutzes . . . . . | 618 |
| § 168                  | Kündigung des Versicherungsnehmers . . . . .               | 674 |
| § 169                  | Rückkaufswert . . . . .                                    | 703 |
| § 170                  | Eintrittsrecht . . . . .                                   | 761 |
| § 171                  | Abweichende Vereinbarungen . . . . .                       | 777 |
| Sachregister . . . . . |                                                            | 779 |
